# Supplementary material for: Different responses of foliar nutrient resorption efficiency in two dominant species to grazing in the desert steppe
Source: Springer Nature journal article supplement (doi:10.1038/s41598-024-53574-3), 2024-02-19
Supplement: 41598_2024_53574_MOESM1_ESM.pdf [file 41598_2024_53574_MOESM1_ESM.pdf]

Supplementary Table S1. Ratio of green leaf nutrients in two species as a function of grazing intensity. Data correspond to mean values  $\pm$  standard errors (n=6). Different bold lowercase letters represent significant differences among grazing intensities ( $p < 0.05$ ).

| Year | Grazing | Sb                        |                         | Cs                         |                         |
|------|---------|---------------------------|-------------------------|----------------------------|-------------------------|
|      |         | C:P                       | N:P                     | C:P                        | N:P                     |
| 2018 | CK      | 469.3 $\pm$ 66.8 <b>b</b> | 23.5 $\pm$ 2.6 <b>b</b> | 321.1 $\pm$ 19.3 <b>ab</b> | 17.5 $\pm$ 1.8 <b>b</b> |
|      | MG      | 458.8 $\pm$ 43.0 <b>b</b> | 25.4 $\pm$ 1.5 <b>b</b> | 275.6 $\pm$ 25.4 <b>b</b>  | 17.2 $\pm$ 1.6 <b>b</b> |
|      | HG      | 653.9 $\pm$ 28.4 <b>a</b> | 32.8 $\pm$ 1.7 <b>a</b> | 361.7 $\pm$ 56.4 <b>a</b>  | 22.5 $\pm$ 4.0 <b>a</b> |
| 2019 | CK      | 479.7 $\pm$ 32.2          | 20.2 $\pm$ 2.0          | 368.0 $\pm$ 12.4 <b>a</b>  | 15.6 $\pm$ 0.9 <b>b</b> |
|      | MG      | 483.6 $\pm$ 10.6          | 18.1 $\pm$ 0.6          | 269.0 $\pm$ 13.6 <b>b</b>  | 14.6 $\pm$ 0.5 <b>b</b> |
|      | HG      | 488.2 $\pm$ 81.4          | 18.4 $\pm$ 2.8          | 362.0 $\pm$ 35.2 <b>a</b>  | 16.9 $\pm$ 1.5 <b>a</b> |

CK: control (no grazing); MG: moderate grazing (1.82 sheep ha<sup>-1</sup> corresponding to 4 sheep per plot); HG: heavy grazing (2.71 sheep ha<sup>-1</sup> corresponding to 6 sheep per plot).

Sb: *Stipa breviflora*; Cs: *Cleistogenes songorica*.
